# Supplementary material for: Advanced Materials From Fungal Mycelium: Fabrication and Tuning of Physical Properties
Source: Springer Nature journal article supplement (doi:10.1038/srep41292), 2017-01-24
Supplement: 41598_2017_BFsrep41292_MOESM130_ESM.pdf [file 41598_2017_BFsrep41292_MOESM130_ESM.pdf]

# **ADVANCED MATERIALS FROM FUNGAL MYCELIUM: FABRICATION AND TUNING OF PHYSICAL PROPERTIES**

Muhammad Haneef<sup>1,2</sup>, Luca Ceseracciu<sup>1</sup>, Claudio Canale<sup>1</sup>, Ilker S. Bayer<sup>1</sup>, José A. Heredia-Guerrero<sup>1\*</sup>, and Athanassia Athanassiou<sup>1\*</sup>

<sup>1</sup>Smart Materials, Department of Nanophysics, Istituto Italiano di Tecnologia (IIT), via Morego 30, 16163, Genoa, Italy

<sup>2</sup>DIBRIS, University of Genoa, via Opera Pia, 13, 16145, Genoa, Italy

\*Corresponding authors: J.A.H.G ([jose.heredia-guerrero@iit.it](mailto:jose.heredia-guerrero@iit.it)) and A.A. ([athanassia.athanassiou@iit.it](mailto:athanassia.athanassiou@iit.it))

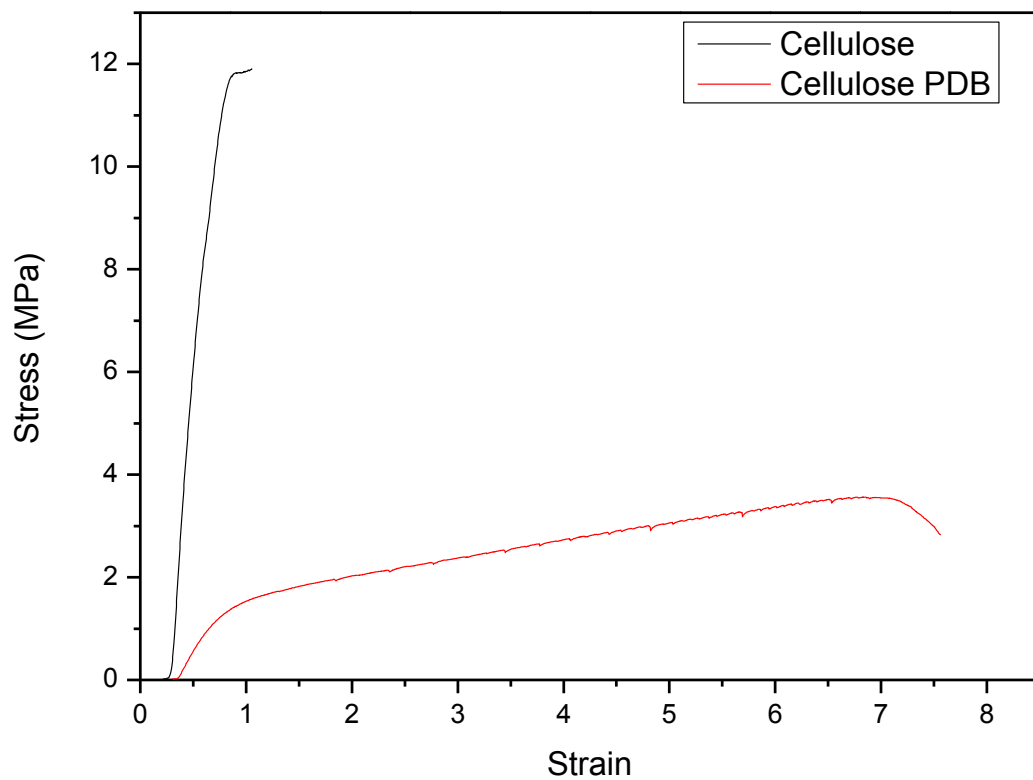

**Supplementary Figure S1.** Typical tensile stress-strain curves for cellulose and cellulose-PDB substrates.
